# Supplementary material
Source: Royal Society of Chemistry journal article supplement (doi:10.1039/d6nj00183a)
Supplement: d6nj00183a1.pdf [file d6nj00183a1.pdf]

## **Spectroscopic, Thermal and Mass Spectrometry Investigations of Mechanochemically Synthesized Deep Eutectic Solvents**

Oluseyi Olawuyi<sup>1</sup>, Sabbir Ahmed<sup>2</sup>, Momena Begum<sup>1</sup>, Abdul Hannan<sup>1</sup>, Md Rakibul Hasan<sup>2</sup>,  
Shayla Kelley<sup>1</sup>, Lingaraju Gorla<sup>1</sup>, Mukeh Cafarina Ngubui<sup>1</sup>, Wei Zhou<sup>1</sup>, Carl Jacky Staint-  
Louis<sup>1</sup>, and Mohammad A. Halim<sup>1</sup>

<sup>1</sup>Department of Chemistry and Biochemistry, Kennesaw State University, Kennesaw, Georgia,  
USA

<sup>2</sup>Division of Environmental and Green Chemistry, The Red-Green Research Center, BICCB, 16,  
Tejkunipara, Tejgaon, Dhaka 1215, Bangladesh.

\* Correspondence: Mohammad A. Halim; E-mail: [mhalim1@kennesaw.edu](mailto:mhalim1@kennesaw.edu); [orcid.org/0000-0002-1698-7044](https://orcid.org/0000-0002-1698-7044); Phone: +1-470-578-6759

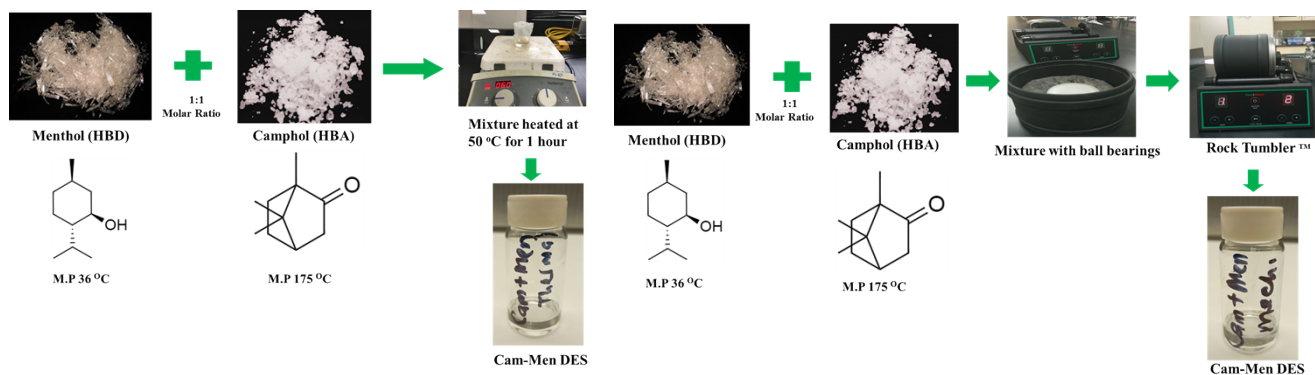

**Figure S1.** Preparation of Camphor-Menthol by thermal method (left), and mechanochemical method (right).

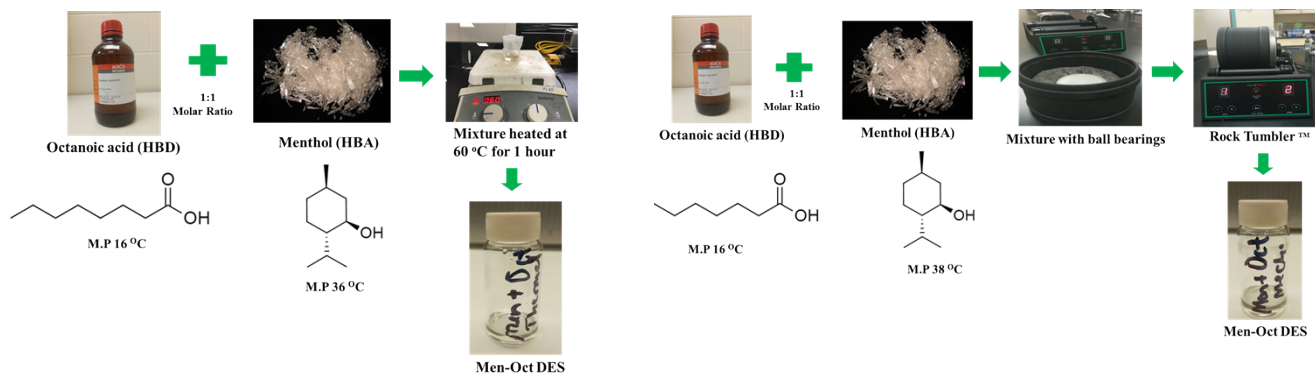

**Figure S2.** Preparation of Men-Oct DES by Thermal Method (left), and Mechanochemical Method (right)

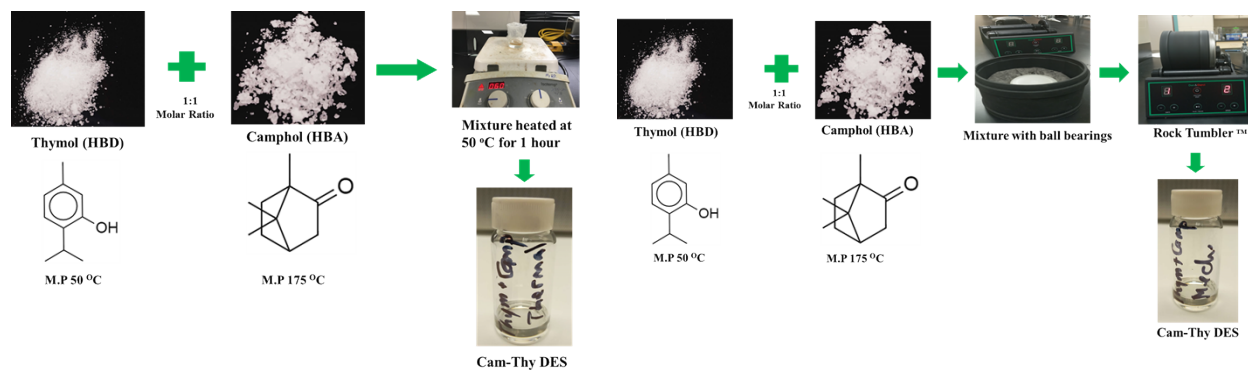

**Figure S3.** Preparation of Cam-Thy DES by Thermal Method (left), and Mechanochemical method (right)

**Figure S4:**  $^1\text{H}$  NMR spectra of menthol (red), octanoic acid (green), the mechanochemically prepared DES (1:1 menthol:octanoic acid, blue), and the thermally prepared DES (1:1 menthol:octanoic acid in black), recorded in  $\text{DMSO-d}_6$  at 298.1 K ( $^1\text{H}$ , 400 MHz). Chemical shift range: 5.0 to 2.5 ppm.

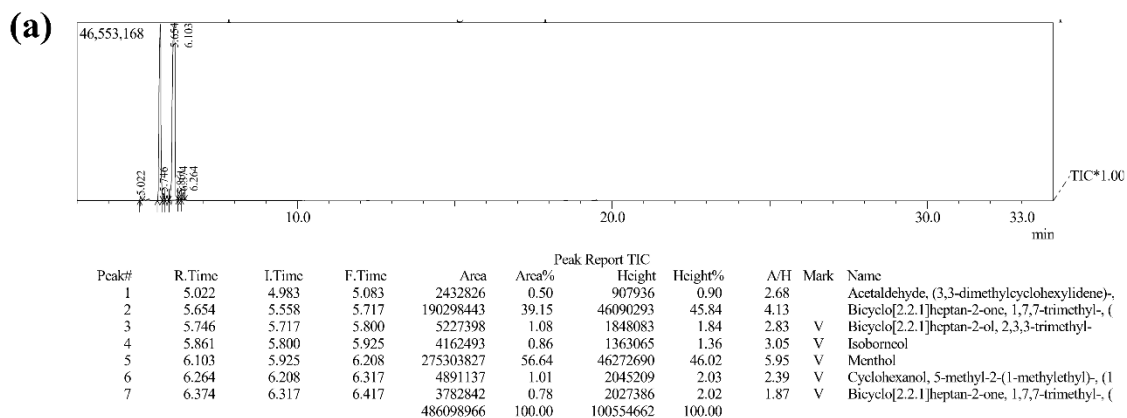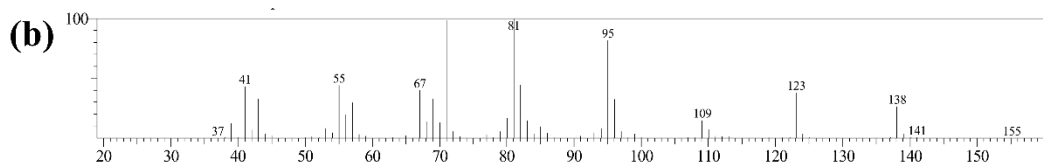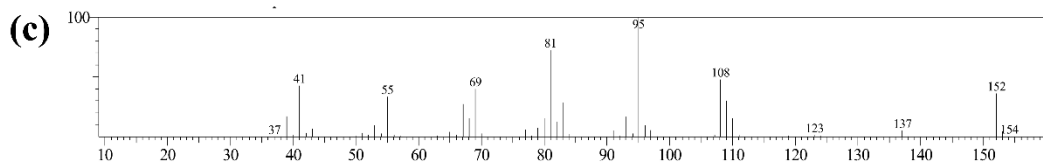

**Figure S5.** GC-MS spectrums of Thermally Prepared Men-Cam DES.

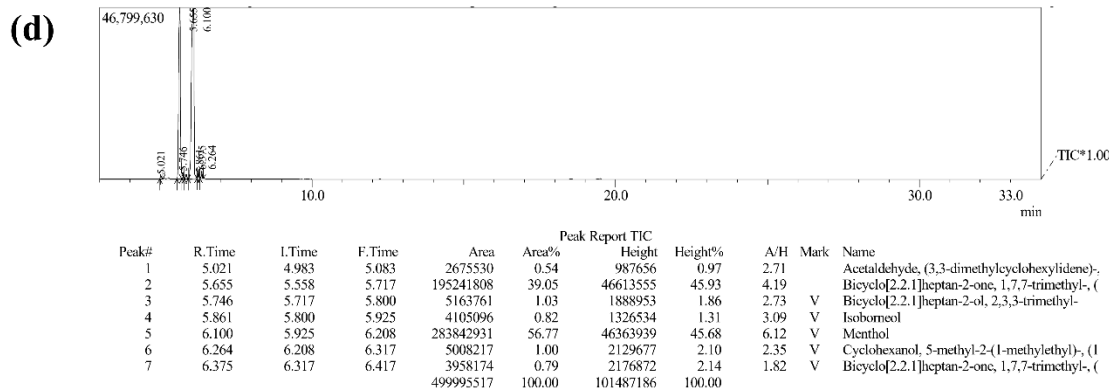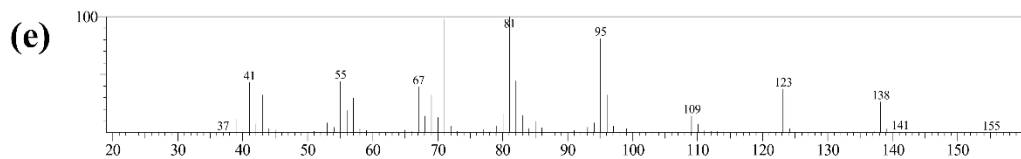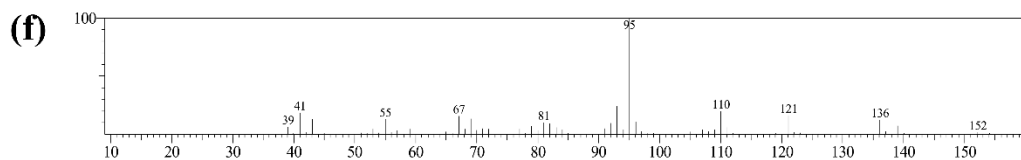

**Figure S6.** GC-MS spectrums of Mechanochemically Prepared Men-Cam DES.

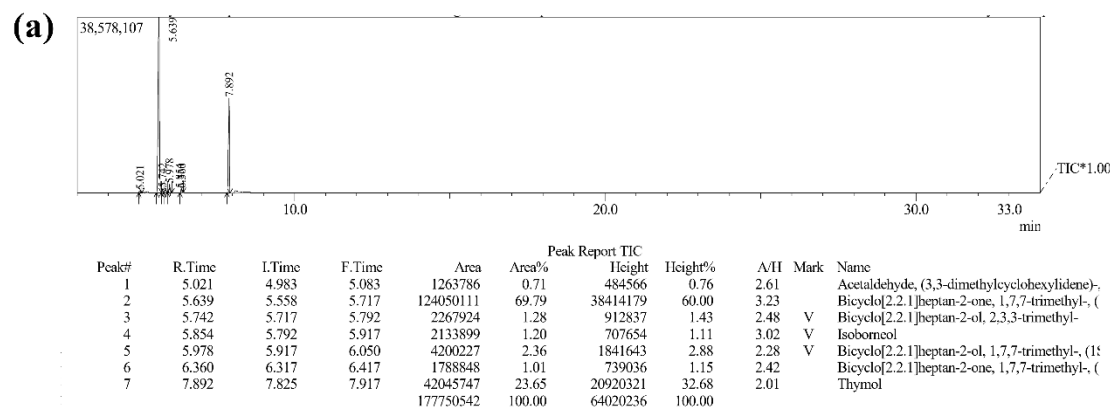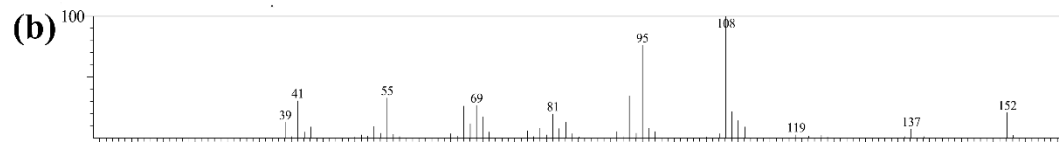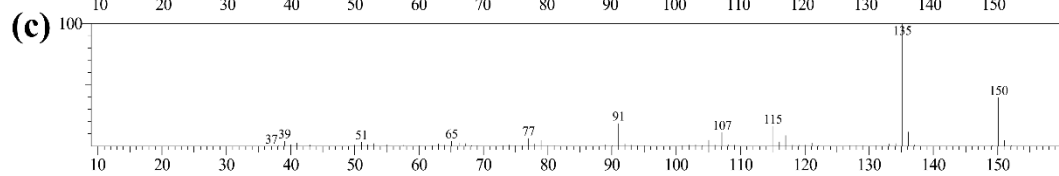

**Figure S7.** GC-MS spectrums of Thermally Prepared Thy-Cam DES.

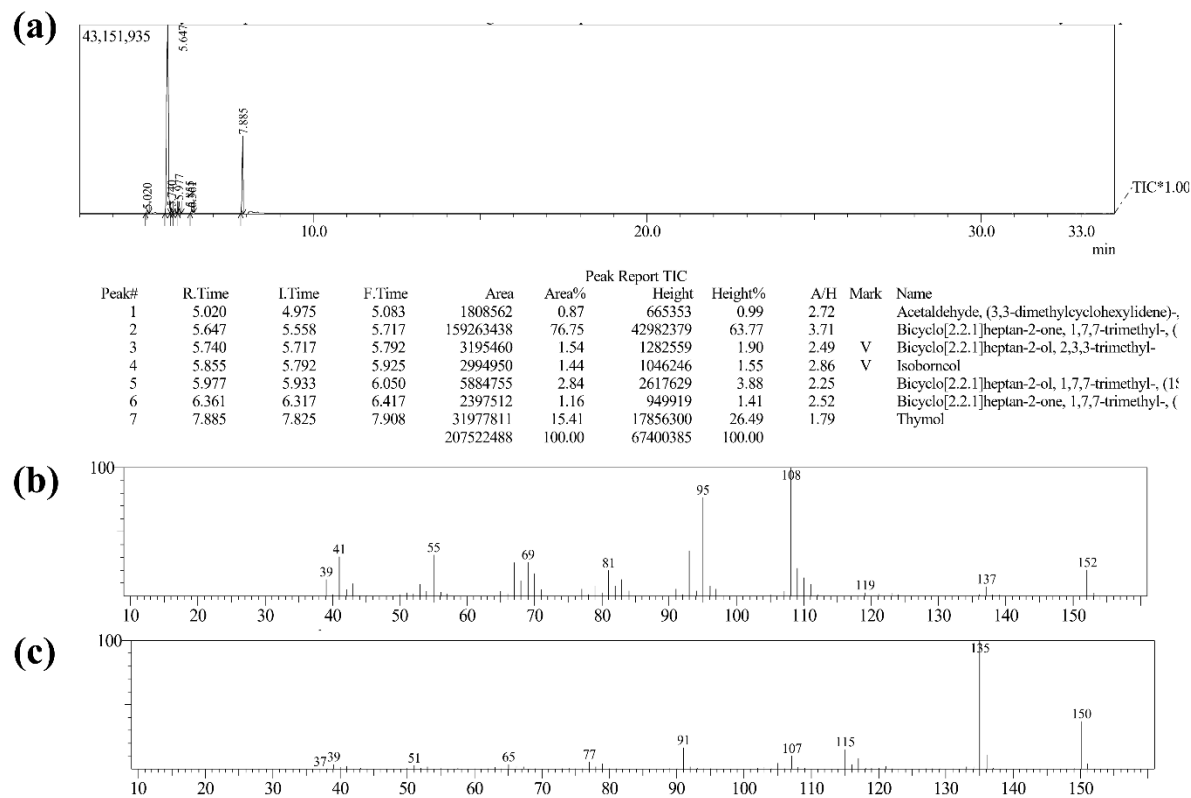

**Figure S8.** GC-MS spectrums of Mechanochemically Prepared Thy-Cam DES.
